# Supplementary material for: Allele-specific RNAN6-methyladenosine modifications reveal functional genetic variants in human tissues
Source: HighWire-hosted journal article supplement (doi:10.1101/gr.277704.123), 2023-08-01
Supplement: Supplemental_Table_S1.xlsx [file Supplemental_Table_S1.xlsx]

## Sheet: Sheet1
Supplemental Table S1.
Putative functional variants for ASm6A regulation identified in this study.
	Start	End
chr1	147229562	147229563
chr15	42451107	42451108
chr16	8948973	8948974
chr19	18499814	18499815
chr2	238483330	238483331
chr7	73150693	73150694
chr15	86288654	86288655
chr16	57116457	57116458
chr16	72110322	72110323
chr16	72110466	72110467
chr19	4171971	4171972
chr20	43058696	43058697
chr2	220404578	220404579
chr4	6304447	6304448
chr5	205359	205360
chr9	116930864	116930865
chr9	139568046	139568047
chr10	105205301	105205302
chr1	161495476	161495477
chr11	67821035	67821036
chr1	206637132	206637133
chr12	122216621	122216622
chr12	129278863	129278864
chr12	9848882	9848883
chr13	24876666	24876667
chr14	105180705	105180706
chr14	24475317	24475318
chr14	24475563	24475564
chr14	94856913	94856914
chr15	28929899	28929900
chr15	66625469	66625470
chr15	70959807	70959808
chr15	77406395	77406396
chr15	77407113	77407114
chr15	79058959	79058960
chr15	81604388	81604389
chr15	85174754	85174755
chr15	85184553	85184554
chr16	108584	108585
chr16	2999217	2999218
chr16	68732456	68732457
chr17	17091745	17091746
chr17	3558694	3558695
chr17	3558697	3558698
chr17	3558699	3558700
chr17	4068286	4068287
chr17	40820197	40820198
chr17	62006431	62006432
chr17	62006432	62006433
chr17	80900644	80900645
chr19	11242132	11242133
chr19	14846691	14846692
chr19	1576923	1576924
chr19	2426827	2426828
chr19	36211117	36211118
chr20	2463591	2463592
chr20	4763298	4763299
chr20	4763310	4763311
chr20	4763437	4763438
chr20	62221248	62221249
chr2	122096017	122096018
chr2	1544616	1544617
chr2	220403872	220403873
chr22	21363560	21363561
chr22	50637596	50637597
chr2	58386528	58386529
chr3	69220041	69220042
chr3	9876918	9876919
chr3	9876986	9876987
chr4	183812045	183812046
chr4	183812142	183812143
chr4	3770068	3770069
chr5	149433321	149433322
chr7	150107957	150107958
chr7	150440042	150440043
chr7	2649818	2649819
chr7	99704719	99704720
chr8	124453661	124453662
chr8	146068321	146068322
chr9	132399199	132399200
chr9	27330513	27330514
chr10	116051567	116051568
chr10	116195775	116195776
chr10	129903015	129903016
chr10	43010870	43010871
chr10	43015559	43015560
chr10	72521650	72521651
chr10	81446344	81446345
chr11	1016889	1016890
chr1	1650796	1650797
chr1	1650800	1650801
chr1	1650806	1650807
chr1	1650831	1650832
chr11	9225325	9225326
chr12	109181744	109181745
chr12	124809878	124809879
chr12	132562290	132562291
chr12	132562410	132562411
chr12	51453365	51453366
chr13	39266483	39266484
chr1	46073488	46073489
chr15	55837055	55837056
chr15	74220083	74220084
chr15	86290157	86290158
chr16	1026372	1026373
chr16	58079164	58079165
chr16	69375657	69375658
chr17	33689925	33689926
chr17	3910124	3910125
chr17	46620287	46620288
chr17	46627578	46627579
chr18	32887932	32887933
chr19	14629149	14629150
chr19	17417564	17417565
chr19	21365594	21365595
chr19	21365649	21365650
chr19	21365651	21365652
chr19	24310412	24310413
chr19	35175591	35175592
chr19	3631232	3631233
chr19	4512552	4512553
chr19	46375778	46375779
chr19	57038560	57038561
chr20	29653182	29653183
chr20	29653235	29653236
chr21	36164404	36164405
chr21	42836985	42836986
chr2	51254900	51254901
chr4	13601336	13601337
chr4	367451	367452
chr4	367454	367455
chr4	6623331	6623332
chr5	73930750	73930751
chr5	95234376	95234377
chr7	138764059	138764060
chr8	144734382	144734383
chr9	79318584	79318585
chr9	79321870	79321871
chr9	79325557	79325558
chr9	98637429	98637430
chr9	99521122	99521123
chrX	118587320	118587321
chrX	5810573	5810574
chrX	71349142	71349143
chr10	121700243	121700244
chr10	121700254	121700255
chr10	28908638	28908639
chr1	151510824	151510825
chr1	155106913	155106914
chr16	31502139	31502140
chr17	76989781	76989782
chr17	76993545	76993546
chr19	757411	757412
chr2	65495886	65495887
chr3	172223626	172223627
chr3	172223689	172223690
chr6	106967184	106967185
chr7	150554994	150554995
chr7	157332171	157332172
chr1	201938994	201938995
chr12	21918614	21918615
chr12	56865039	56865040
chr12	56865055	56865056
chr12	57648622	57648623
chr17	66596462	66596463
chr2	165349458	165349459
chr2	165551403	165551404
chr7	42977090	42977091
chr10	102767116	102767117
chr10	124274242	124274243
chr10	135235320	135235321
chr11	132287836	132287837
chr11	68855482	68855483
chr1	17395479	17395480
chr1	19234915	19234916
chr1	204190575	204190576
chr12	109182048	109182049
chr12	122617988	122617989
chr12	248201	248202
chr1	233119310	233119311
chr12	5025093	5025094
chr13	114150106	114150107
chr14	96553721	96553722
chr14	96558548	96558549
chr14	96558594	96558595
chr15	54307377	54307378
chr16	89349376	89349377
chr17	420466	420467
chr17	72443286	72443287
chr17	79524970	79524971
chr17	907624	907625
chr18	48190270	48190271
chr19	44739398	44739399
chr19	46974232	46974233
chr19	46974305	46974306
chr19	46974306	46974307
chr19	49253388	49253389
chr19	58439305	58439306
chr20	4764681	4764682
chr20	49507343	49507344
chr20	5171164	5171165
chr2	217538256	217538257
chr2	217538309	217538310
chr22	25294368	25294369
chr22	25294375	25294376
chr22	30422106	30422107
chr22	31369323	31369324
chr2	69692522	69692523
chr3	147105789	147105790
chr3	196670091	196670092
chr3	49705511	49705512
chr3	56762248	56762249
chr4	187629139	187629140
chr4	187629769	187629770
chr4	90167505	90167506
chr4	90167541	90167542
chr5	140870515	140870516
chr5	175934000	175934001
chr5	795932	795933
chr5	796220	796221
chr6	21594200	21594201
chr6	80626374	80626375
chr7	104752797	104752798
chr7	65422427	65422428
chr7	76255451	76255452
chr8	17555028	17555029
chr8	22477777	22477778
chr8	23290450	23290451
chr8	53586705	53586706
chr9	100362598	100362599
chr9	138899878	138899879
chr9	19516279	19516280
chr9	5969248	5969249
chr10	106074941	106074942
chr10	49219201	49219202
chr11	107197639	107197640
chr11	117077033	117077034
chr11	119205734	119205735
chr11	119244094	119244095
chr1	120165825	120165826
chr1	145290082	145290083
chr1	145290202	145290203
chr1	145290244	145290245
chr1	145290249	145290250
chr1	145290278	145290279
chr11	566935	566936
chr1	16060610	16060611
chr11	609067	609068
chr11	72946019	72946020
chr12	120898045	120898046
chr12	12629591	12629592
chr1	228547255	228547256
chr1	2337031	2337032
chr1	25825780	25825781
chr12	6128169	6128170
chr12	663395	663396
chr13	110407905	110407906
chr14	50088345	50088346
chr16	1252117	1252118
chr16	1252258	1252259
chr16	70193613	70193614
chr16	71962590	71962591
chr16	72821637	72821638
chr16	85126540	85126541
chr17	63554590	63554591
chr1	90048247	90048248
chr19	21477430	21477431
chr19	3631224	3631225
chr19	38573449	38573450
chr19	44500700	44500701
chr19	44515073	44515074
chr19	4511579	4511580
chr19	4511580	4511581
chr19	4511597	4511598
chr19	4511598	4511599
chr19	46287199	46287200
chr19	59082638	59082639
chr20	25456887	25456888
chr22	20132971	20132972
chr2	69693005	69693006
chr3	124739891	124739892
chr3	45266554	45266555
chr3	49200691	49200692
chr3	49570881	49570882
chr4	103552829	103552830
chr4	140640278	140640279
chr4	377426	377427
chr5	10680546	10680547
chr5	132232314	132232315
chr5	180661561	180661562
chr6	151766551	151766552
chr6	3270936	3270937
chr7	128292533	128292534
chr7	138946295	138946296
chr7	150910641	150910642
chr7	156742748	156742749
chr7	64439700	64439701
chr7	66019630	66019631
chr7	6777368	6777369
chr7	76255439	76255440
chr8	144998189	144998190
chr9	109689858	109689859
chr9	132590158	132590159
chr9	21862270	21862271
chr9	25677952	25677953
chr9	35056960	35056961
chr9	84304054	84304055
chr10	25888179	25888180
chr1	111215471	111215472
chr11	125301804	125301805
chr11	8131595	8131596
chr12	120882216	120882217
chr12	44902572	44902573
chr12	52200741	52200742
chr13	25504692	25504693
chr14	38679813	38679814
chr14	63758431	63758432
chr16	19869390	19869391
chr17	37223635	37223636
chr19	37130346	37130347
chr19	44570392	44570393
chr19	58212426	58212427
chr21	45861789	45861790
chr22	35948264	35948265
chr3	183528441	183528442
chr3	183534975	183534976
chr3	56667479	56667480
chr4	6235404	6235405
chr4	6324245	6324246
chr5	112179908	112179909
chr6	38136449	38136450
chr6	52268889	52268890
chr6	70071172	70071173
chr7	8792147	8792148
chr10	38411430	38411431
chr1	116206422	116206423
chr1	12072517	12072518
chr1	149915642	149915643
chr1	155106549	155106550
chr1	167757209	167757210
chr12	121441460	121441461
chr12	132426195	132426196
chr1	23836363	23836364
chr1	31345784	31345785
chr13	33349340	33349341
chr14	24906954	24906955
chr1	47184195	47184196
chr1	47717188	47717189
chr14	81251254	81251255
chr14	91738695	91738696
chr15	63970455	63970456
chr15	73044574	73044575
chr15	85413830	85413831
chr16	3536751	3536752
chr16	397043	397044
chr1	64125367	64125368
chr16	50350882	50350883
chr16	70698059	70698060
chr16	78133670	78133671
chr16	8875857	8875858
chr16	8875860	8875861
chr16	89293270	89293271
chr17	13933317	13933318
chr17	3564067	3564068
chr17	3564072	3564073
chr17	42267948	42267949
chr17	43185499	43185500
chr17	79526010	79526011
chr18	55143765	55143766
chr18	77663045	77663046
chr19	17393529	17393530
chr19	17394123	17394124
chr19	17394503	17394504
chr19	41858920	41858921
chr19	4511280	4511281
chr19	52090190	52090191
chr19	58231540	58231541
chr21	43161804	43161805
chr22	21998239	21998240
chr2	85549546	85549547
chr2	85554079	85554080
chr3	186459495	186459496
chr3	186795639	186795640
chr3	5025649	5025650
chr4	39448528	39448529
chr4	39450843	39450844
chr4	83350953	83350954
chr4	983059	983060
chr5	153825972	153825973
chr6	1313116	1313117
chr6	1313120	1313121
chr6	35837546	35837547
chr7	2294122	2294123
chr7	5343635	5343636
chr7	72984299	72984300
chr8	25365277	25365278
chr9	135866647	135866648
chr9	135866692	135866693
chr9	136520661	136520662
chr9	136522186	136522187
chr9	33917497	33917498
chrX	153713166	153713167
chr10	129896231	129896232
chr10	129901746	129901747
chr10	129903464	129903465
chr10	43009564	43009565
chr11	1016868	1016869
chr11	1016893	1016894
chr11	1016917	1016918
chr11	1016918	1016919
chr11	1017044	1017045
chr11	1017112	1017113
chr11	1017219	1017220
chr11	1017301	1017302
chr11	1017316	1017317
chr11	1017324	1017325
chr11	1017336	1017337
chr11	1017772	1017773
chr11	1017934	1017935
chr11	1018011	1018012
chr11	1018024	1018025
chr11	1018030	1018031
chr11	1018373	1018374
chr11	124857707	124857708
chr11	61664991	61664992
chr11	63722447	63722448
chr11	74554917	74554918
chr12	11174371	11174372
chr12	11174379	11174380
chr12	11174389	11174390
chr12	11174396	11174397
chr12	11174415	11174416
chr12	41464002	41464003
chr13	110407814	110407815
chr13	114110406	114110407
chr14	104646325	104646326
chr14	81743564	81743565
chr1	55075061	55075062
chr15	80886395	80886396
chr16	12663785	12663786
chr16	31088346	31088347
chr16	89220985	89220986
chr16	89806613	89806614
chr17	15690792	15690793
chr17	6677395	6677396
chr17	70642922	70642923
chr18	672042	672043
chr19	10334442	10334443
chr19	20727132	20727133
chr19	46269075	46269076
chr19	52197456	52197457
chr19	53410372	53410373
chr19	53410827	53410828
chr19	57038558	57038559
chr19	58420151	58420152
chr19	58420161	58420162
chr19	58420166	58420167
chr19	58774580	58774581
chr19	59093463	59093464
chr19	7084086	7084087
chr20	29653404	29653405
chr20	29653407	29653408
chr20	29653408	29653409
chr20	29653457	29653458
chr20	29653460	29653461
chr20	29653586	29653587
chr20	36719109	36719110
chr20	55745680	55745681
chr20	60776301	60776302
chr20	7958459	7958460
chr2	179413109	179413110
chr2	198950028	198950029
chr22	36622821	36622822
chr2	73716809	73716810
chr3	38525323	38525324
chr3	88189340	88189341
chr4	159826378	159826379
chr4	39124934	39124935
chr5	176817142	176817143
chr5	76372708	76372709
chr7	137564765	137564766
chr7	156431730	156431731
chr7	63981187	63981188
chr8	143747270	143747271
chr8	22875984	22875985
chr8	91017744	91017745
chr9	135470413	135470414
chr9	136132349	136132350
chr9	136279934	136279935
chr11	111956071	111956072
chr1	208195980	208195981
chr14	57675184	57675185
chr16	24802324	24802325
chr16	5075225	5075226
chr17	47591269	47591270
chr17	71233129	71233130
chr17	79514128	79514129
chr18	72907431	72907432
chr19	35434511	35434512
chr19	35435068	35435069
chr19	38077099	38077100
chr3	160787501	160787502
chr6	158735089	158735090
chr6	34003684	34003685
chr7	64864893	64864894
chr9	116815776	116815777
chr9	134183912	134183913
chr9	95599824	95599825
chr9	95599847	95599848
chr11	58979392	58979393
chr1	175130203	175130204
chr11	76370447	76370448
chr15	80263405	80263406
chr16	86547495	86547496
chr17	56572523	56572524
chr17	76799834	76799835
chr20	1918426	1918427
chr3	105086084	105086085
chr5	115781980	115781981
chr6	3723763	3723764
chr1	20977220	20977221
chr17	79525861	79525862
chr3	13613014	13613015
chr11	75282881	75282882
chr12	10311928	10311929
chr12	10311961	10311962
chr12	10312288	10312289
chr12	123186214	123186215
chr4	145567470	145567471
chr12	133384886	133384887
chr17	3764629	3764630
chr17	3765267	3765268
chr19	18391073	18391074
chr19	18391078	18391079
chr20	4837158	4837159
chr5	141244355	141244356
chr6	44243558	44243559
chr7	157332149	157332150
chr10	3180688	3180689
chr1	111957310	111957311
chr1	144828856	144828857
chr11	60184190	60184191
chr11	60184276	60184277
chr1	205883889	205883890
chr14	93155108	93155109
chr15	64200356	64200357
chr16	57116513	57116514
chr16	86510350	86510351
chr16	86547000	86547001
chr17	33348540	33348541
chr17	5418106	5418107
chr19	42042946	42042947
chr21	42836728	42836729
chr2	202149695	202149696
chr22	37710568	37710569
chr3	195515616	195515617
chr5	178540655	178540656
chr5	35877913	35877914
chr9	133967239	133967240
chr11	65191446	65191447
chr1	16890483	16890484
chr1	226924240	226924241
chr15	98516621	98516622
chr18	48323592	48323593
chr20	5903222	5903223
chr20	5903847	5903848
chr20	5903893	5903894
chr2	6109689	6109690
chr2	6109724	6109725
chr5	16474643	16474644
chr5	16701876	16701877
chr5	65350172	65350173
chr9	128064672	128064673
chr9	79321386	79321387
chr9	79324740	79324741
chr11	6648423	6648424
chr13	21562370	21562371
chr17	45369788	45369789
chr19	4511490	4511491
chr2	102508145	102508146
chr10	15255249	15255250
chr11	33565592	33565593
chr12	125834094	125834095
chr12	42854204	42854205
chr17	17397981	17397982
chr5	82834629	82834630
chr7	23213951	23213952
chr17	62017420	62017421
chr19	4511745	4511746
chr22	26164412	26164413
chr1	15441274	15441275
chr12	116429740	116429741
chr12	122757512	122757513
chr1	2435827	2435828
chr17	3764486	3764487
chr19	39432412	39432413
chr19	58231806	58231807
chr22	26688839	26688840
chr5	150945482	150945483
chr5	150945861	150945862
chr5	150945930	150945931
chr5	150946435	150946436
chr5	150946772	150946773
chr7	135078799	135078800
chr7	150070662	150070663
chr7	5273001	5273002
chr7	589867	589868
chr10	50534645	50534646
chr10	88446632	88446633
chr11	12555607	12555608
chr11	76507581	76507582
chr1	220870458	220870459
chr13	113751204	113751205
chr13	113753238	113753239
chr14	92470180	92470181
chr15	42983922	42983923
chr15	67486774	67486775
chr17	78518779	78518780
chr17	8224275	8224276
chr18	56204976	56204977
chr18	56204990	56204991
chr18	67992278	67992279
chr19	57876365	57876366
chr19	57876419	57876420
chr19	57876431	57876432
chr20	62126298	62126299
chr21	28215337	28215338
chr2	1481230	1481231
chr2	235951818	235951819
chr22	45723806	45723807
chr22	45723841	45723842
chr2	48808593	48808594
chr3	124746048	124746049
chr4	156631864	156631865
chr4	88929452	88929453
chr5	140594441	140594442
chr5	140594465	140594466
chr5	140594466	140594467
chr5	140594469	140594470
chr5	141248192	141248193
chr5	149212429	149212430
chr7	39990987	39990988
chr8	11616570	11616571
chr8	143855748	143855749
chr8	143855754	143855755
chr8	1906341	1906342
chr9	116346199	116346200
chr9	95218598	95218599
chr10	5567863	5567864
chr1	192780656	192780657
chr1	192780842	192780843
chr1	192780843	192780844
chr17	28511883	28511884
chr11	114441942	114441943
chr11	617536	617537
chr11	62290978	62290979
chr15	99671577	99671578
chr10	81682644	81682645
chr11	128707974	128707975
chr11	128708008	128708009
chr1	144851536	144851537
chr12	112194726	112194727
chr12	299714	299715
chr19	14185225	14185226
chr3	195453013	195453014
chr3	46711806	46711807
chr5	1224082	1224083
chr9	1056727	1056728
chr9	1057203	1057204
chr11	44951066	44951067
chr11	840476	840477
chr14	95645871	95645872
chr15	34634032	34634033
chr19	58805782	58805783
chr2	219529004	219529005
chr22	31371453	31371454
chr2	71654449	71654450
chr4	4421618	4421619
chr5	179264730	179264731
chr6	43752372	43752373
chr7	15651691	15651692
chr8	22432376	22432377
chr10	96087865	96087866
chr14	24908869	24908870
chr14	24909071	24909072
chr3	195453248	195453249
chr3	43618503	43618504
chr7	140154490	140154491
chr10	44871134	44871135
chr10	45489223	45489224
chr10	75407648	75407649
chr1	10713764	10713765
chr11	204985	204986
chr1	120612167	120612168
chr11	44951591	44951592
chr11	68855362	68855363
chr11	71725590	71725591
chr12	109974263	109974264
chr12	115121033	115121034
chr1	2439684	2439685
chr12	671242	671243
chr13	23898815	23898816
chr14	68144190	68144191
chr15	65871377	65871378
chr15	81271247	81271248
chr15	81271251	81271252
chr16	12009580	12009581
chr16	1605043	1605044
chr16	1605052	1605053
chr1	6659444	6659445
chr16	89220845	89220846
chr16	89712379	89712380
chr16	89762409	89762410
chr17	12667581	12667582
chr17	2298496	2298497
chr17	45369776	45369777
chr17	81052406	81052407
chr18	56204409	56204410
chr18	56246441	56246442
chr19	42776579	42776580
chr19	45411940	45411941
chr19	56132486	56132487
chr19	56888734	56888735
chr19	58596448	58596449
chr20	44517359	44517360
chr2	101009081	101009082
chr21	46932327	46932328
chr2	179698944	179698945
chr22	18274091	18274092
chr22	32110672	32110673
chr2	239050032	239050033
chr3	45960850	45960851
chr4	2746480	2746481
chr4	2831754	2831755
chr4	57798173	57798174
chr4	6925388	6925389
chr6	159654486	159654487
chr6	46458972	46458973
chr7	192799	192800
chr7	29690704	29690705
chr7	30496381	30496382
chr7	70254787	70254788
chr8	144996407	144996408
chr8	61654206	61654207
chr8	94746697	94746698
chr9	101984092	101984093
chr9	115931702	115931703
chr9	133760634	133760635
chr9	139618460	139618461
chr9	140638415	140638416
chrX	3238166	3238167
chr1	172410966	172410967
chr1	23687826	23687827
chr16	27373860	27373861
chr16	66437268	66437269
chr16	88763957	88763958
chr19	19790158	19790159
chr19	53116059	53116060
chr19	53960223	53960224
chr22	19026022	19026023
chr9	104152789	104152790
chr9	123665900	123665901
chr10	14562979	14562980
chr11	73019482	73019483
chr11	73115945	73115946
chr11	76371417	76371418
chr12	128900004	128900005
chr1	214557899	214557900
chr1	226173216	226173217
chr12	7248674	7248675
chr1	61921033	61921034
chr17	40009949	40009950
chr17	66130643	66130644
chr19	3053801	3053802
chr19	54682974	54682975
chr20	39988745	39988746
chr22	37964298	37964299
chr2	239237973	239237974
chr2	64321822	64321823
chr3	42578508	42578509
chr3	42578767	42578768
chr3	45077457	45077458
chr4	1164276	1164277
chr4	140810636	140810637
chr6	42072988	42072989
chr7	100482025	100482026
chr8	80677988	80677989
chr9	117551452	117551453
chr17	33593195	33593196
chr17	40906040	40906041
chr3	30046190	30046191
chr10	114576752	114576753
chr10	30317837	30317838
chr10	61789271	61789272
chr10	81525872	81525873
chr11	1016608	1016609
chr11	12555709	12555710
chr1	144879089	144879090
chr11	6340705	6340706
chr11	653967	653968
chr11	76370046	76370047
chr11	93914477	93914478
chr11	93914989	93914990
chr12	12483712	12483713
chr1	31837173	31837174
chr13	37422197	37422198
chr13	37422612	37422613
chr14	77743643	77743644
chr15	42140165	42140166
chr15	42433801	42433802
chr1	54317484	54317485
chr1	55207982	55207983
chr1	55207983	55207984
chr15	76551851	76551852
chr15	86125078	86125079
chr16	11963635	11963636
chr16	12665370	12665371
chr16	12666380	12666381
chr16	83949505	83949506
chr17	2289698	2289699
chr17	59475641	59475642
chr17	70642789	70642790
chr17	80901001	80901002
chr17	80901035	80901036
chr18	60795190	60795191
chr18	72912468	72912469
chr19	10763006	10763007
chr19	11032484	11032485
chr19	39888448	39888449
chr19	44471208	44471209
chr19	44471322	44471323
chr19	53099607	53099608
chr19	53099636	53099637
chr19	57037605	57037606
chr19	57039356	57039357
chr19	9868130	9868131
chr20	52193121	52193122
chr20	60964300	60964301
chr21	43305591	43305592
chr2	209191081	209191082
chr22	18211020	18211021
chr2	219209884	219209885
chr22	20779767	20779768
chr22	45258538	45258539
chr3	124482221	124482222
chr3	132086824	132086825
chr3	135914714	135914715
chr3	13679694	13679695
chr3	13679707	13679708
chr3	195595296	195595297
chr4	113197768	113197769
chr4	1245276	1245277
chr5	159679198	159679199
chr5	74324547	74324548
chr5	74324901	74324902
chr5	78610465	78610466
chr7	102087201	102087202
chr7	128294348	128294349
chr7	2768934	2768935
chr7	29725078	29725079
chr7	65842923	65842924
chr7	66018940	66018941
chr7	97836188	97836189
chr8	146202626	146202627
chr8	196273	196274
chr8	6616136	6616137
chr9	123606100	123606101
chr9	136197833	136197834
chr9	136199502	136199503
chr9	139618837	139618838
chr9	21865373	21865374
chr9	80038802	80038803
chr9	8485833	8485834
chr9	8485927	8485928
chrX	134420222	134420223
chr11	118343847	118343848
chr11	125831700	125831701
chr1	115168096	115168097
chr12	129189701	129189702
chr12	132623659	132623660
chr1	231558010	231558011
chr15	89455767	89455768
chr16	1962046	1962047
chr16	1962131	1962132
chr19	53087148	53087149
chr20	18122911	18122912
chr2	43992574	43992575
chr2	65298838	65298839
chr4	88929304	88929305
chr6	161557661	161557662
chr6	35423661	35423662
chr8	12295027	12295028
chr8	12295083	12295084
chr8	145057867	145057868
chr8	8997876	8997877
chr9	111696213	111696214
chr16	23226786	23226787
chr16	23227025	23227026
chr19	3976162	3976163
chr2	232573291	232573292
chr7	100075190	100075191
chr12	133384863	133384864
chr4	128564999	128565000
chr8	69143995	69143996
chr3	112358342	112358343
chr4	24801434	24801435
chr16	28332538	28332539
chr3	69158093	69158094
chr3	69158230	69158231
chr8	124664872	124664873
chr8	124664873	124664874
chr10	121436067	121436068
chr10	97920061	97920062
chr1	151554502	151554503
chr1	160517213	160517214
chr1	169510138	169510139
chr1	21047091	21047092
chr1	21047724	21047725
chr1	21544446	21544447
chr1	21544600	21544601
chr12	49223718	49223719
chr13	44603772	44603773
chr15	33064653	33064654
chr1	62675618	62675619
chr16	70191028	70191029
chr19	21300461	21300462
chr19	3958707	3958708
chr19	56127596	56127597
chr20	61444938	61444939
chr2	128477083	128477084
chr21	34669380	34669381
chr21	38739682	38739683
chr21	44328829	44328830
chr21	46189650	46189651
chr21	46189651	46189652
chr21	46932382	46932383
chr2	71559444	71559445
chr5	112176755	112176756
chr5	112228666	112228667
chr5	148384234	148384235
chr5	178540025	178540026
chr5	38933748	38933749
chr6	55739552	55739553
chr7	35293416	35293417
chr8	102679321	102679322
chr8	144827276	144827277
chr8	146067124	146067125
chr9	133967509	133967510
chr9	25677256	25677257
chr1	145075922	145075923
chr15	43012273	43012274
chr2	48822380	48822381
chr3	195686890	195686891
chr6	32627832	32627833
chr6	32627843	32627844
chr6	32627849	32627850
chr6	32627851	32627852
chr6	37142033	37142034
chr10	3180950	3180951
chr1	212538455	212538456
chr1	6284679	6284680
chr1	75038227	75038228
chr18	29847819	29847820
chr19	18109313	18109314
chr19	19868754	19868755
chr19	21909732	21909733
chr19	41314192	41314193
chr19	52552668	52552669
chr19	58027459	58027460
chr20	32232595	32232596
chr21	33371654	33371655
chr21	48019238	48019239
chr2	170403029	170403030
chr22	19167408	19167409
chr3	181457600	181457601
chr3	185865616	185865617
chr3	195460286	195460287
chr3	52873983	52873984
chr5	132534020	132534021
chr7	131813406	131813407
chr7	99227171	99227172
chr9	117406600	117406601
chr11	35640483	35640484
chr11	40137542	40137543
chr11	47261070	47261071
chr1	17198831	17198832
chr1	178063039	178063040
chr1	179078172	179078173
chr1	228787737	228787738
chr1	228788148	228788149
chr13	26595816	26595817
chr13	26789637	26789638
chr15	56388032	56388033
chr16	4016462	4016463
chr16	90109710	90109711
chr17	19284649	19284650
chr17	48703751	48703752
chr17	66596768	66596769
chr17	74289874	74289875
chr17	74289907	74289908
chr17	77758690	77758691
chr17	79004270	79004271
chr18	31804326	31804327
chr18	72998885	72998886
chr19	12188316	12188317
chr19	16612010	16612011
chr19	44610294	44610295
chr19	44610304	44610305
chr19	58154521	58154522
chr20	5281461	5281462
chr2	133541574	133541575
chr22	17600496	17600497
chr22	22050768	22050769
chr22	22842956	22842957
chr22	50658423	50658424
chr3	186795923	186795924
chr3	195590874	195590875
chr3	33431735	33431736
chr4	151177431	151177432
chr5	63627013	63627014
chr6	114378969	114378970
chr6	158094561	158094562
chr6	28120994	28120995
chr6	43230969	43230970
chr7	43916198	43916199
chr7	49815389	49815390
chr7	49815473	49815474
chr7	49815492	49815493
chr7	76112248	76112249
chr8	144733668	144733669
chr8	144994336	144994337
chr8	146221892	146221893
chr1	144891581	144891582
chr1	144892148	144892149
chr1	169510117	169510118
chr1	169512092	169512093
chr11	77937656	77937657
chr11	77937661	77937662
chr1	183212547	183212548
chr1	26162029	26162030
chr14	103399447	103399448
chr14	32561777	32561778
chr14	57741549	57741550
chr1	52498369	52498370
chr1	52498860	52498861
chr17	38420964	38420965
chr17	38420967	38420968
chr19	45912001	45912002
chr5	43313530	43313531
chr7	2768863	2768864
chr8	53570327	53570328
chr8	69143972	69143973
chr8	69143987	69143988
chr8	95541301	95541302
chr9	98734890	98734891
chrX	107396957	107396958
chr10	123239088	123239089
chr8	19263476	19263477
chr10	72520659	72520660
chr10	72520943	72520944
chr10	72521174	72521175
chr11	68029610	68029611
chr13	30078718	30078719
chr1	33328164	33328165
chr14	74527189	74527190
chr15	89401378	89401379
chr15	93008471	93008472
chr16	2088109	2088110
chr18	56148825	56148826
chr18	56204249	56204250
chr19	1257536	1257537
chr19	44740601	44740602
chr19	50436714	50436715
chr21	45182000	45182001
chr21	45750167	45750168
chr21	46711473	46711474
chr2	85549303	85549304
chr4	13606575	13606576
chr5	477967	477968
chr6	12162007	12162008
chr6	42995210	42995211
chr6	53519061	53519062
chr8	124663894	124663895
chr8	133854969	133854970
chr9	14784388	14784389
chr9	82187517	82187518
chr9	91992599	91992600
chr10	32217689	32217690
chr11	119179643	119179644
chr1	17734932	17734933
chr1	218614838	218614839
chr1	228509379	228509380
chr1	23419260	23419261
chr1	23419373	23419374
chr1	55074839	55074840
chr16	90032405	90032406
chr17	7217462	7217463
chr22	19969074	19969075
chr4	187627791	187627792
chr6	10556871	10556872
chr6	16327329	16327330
chr7	6660789	6660790
chrX	2822252	2822253
chrX	2822600	2822601
chr17	81052422	81052423
chr16	78064554	78064555
chr17	47591689	47591690
chr17	47591702	47591703
chr5	196300	196301
chr2	69053753	69053754
chr3	123452837	123452838
chr7	73818403	73818404
chr14	24662046	24662047
chr14	77492764	77492765
chr3	113005754	113005755
chr19	53117016	53117017
chr10	11912430	11912431
chr2	239075811	239075812
chr6	90368379	90368380
chr8	8997613	8997614
chr17	72945657	72945658
chr19	49207660	49207661
chr15	54270792	54270793
chr2	237032669	237032670
chr5	5133030	5133031
chr1	118165690	118165691
chr14	35871216	35871217
chr19	41774139	41774140
chr4	37904088	37904089
chr1	147716689	147716690
chr1	154548879	154548880
chr1	154548945	154548946
chr11	86663642	86663643
chr11	92590447	92590448
chr1	204985956	204985957
chr1	208196767	208196768
chr12	48578808	48578809
chr12	69967861	69967862
chr15	40845951	40845952
chr15	74043456	74043457
chr15	80886554	80886555
chr16	11274078	11274079
chr16	12663761	12663762
chr16	69362451	69362452
chr18	9536248	9536249
chr19	13409471	13409472
chr19	53913554	53913555
chr19	58928301	58928302
chr19	58930176	58930177
chr20	4763083	4763084
chr2	118676835	118676836
chr21	28296134	28296135
chr2	128621468	128621469
chr3	24006496	24006497
chr3	49758763	49758764
chr4	1244217	1244218
chr4	3514228	3514229
chr5	140619790	140619791
chr5	140620791	140620792
chr5	662954	662955
chr6	170068834	170068835
chr7	154685220	154685221
chr11	82443816	82443817
chr19	38055611	38055612
chr19	58291620	58291621
chr3	41280826	41280827
chr2	109379949	109379950
chr6	64422983	64422984
chr11	94862493	94862494
chr13	114149890	114149891
chr17	41843930	41843931
chr19	58370656	58370657
chr4	7763160	7763161
chr4	7763583	7763584
chr4	7763760	7763761
chr6	17764278	17764279
chr7	64864799	64864800
chr7	131195725	131195726
chr3	115529091	115529092
chr7	28997140	28997141
chr3	195516629	195516630
chr12	121458399	121458400
chr21	46191173	46191174
chr5	134907475	134907476
