# Supplementary material for: Allele-specific RNAN6-methyladenosine modifications reveal functional genetic variants in human tissues
Source: HighWire-hosted journal article supplement (doi:10.1101/gr.277704.123), 2023-08-01
Supplement: Supplemental_Table_S2.xlsx [file Supplemental_Table_S2.xlsx]

## Sheet: Sheet1
Supplemental Table S2.
Table showing the RBPs enriched for or ASB overlapping putative functional ASm6A variants, having protein-protein interaction with m6A methyltransferases, demethylases, or readers, and the correlation between RBP expression and aggregative m6A level of its targets.
RBP	Enrich-ment	ASB overlap with functional variants	protein-protein interaction	Corre-lation	P	R
AGGF1	no	yes	YTHDC2	yes	0.046	0.23
AKAP1	yes	no	IGF2BP2,IGF2BP3,YTHDF1,YTHDF2	no	NA	NA
AKAP8L	no	yes	METTL3	no	NA	NA
AUH	no	yes	NA	no	NA	NA
BCCIP	no	yes	FTO	yes	0.00025	-0.38
BCLAF1	no	no	NA	yes	0.000188	0.557
BUD13	no	yes	YTHDC2	yes	3.3e-05	0.51
CSTF2	no	yes	YTHDC2,YTHDF1,YTHDF2	no	NA	NA
CSTF2T	no	yes	YTHDC2,YTHDF1,YTHDF2	yes	1.1e-06	0.64
DDX24	no	yes	YTHDC2,FTO	no	NA	NA
DDX3X	yes	yes	YTHDC2,IGF2BP1,METTL3,YTHDF1,YTHDF2	yes	0.00023	0.59
DDX59	no	yes	YTHDC2	no	NA	NA
DDX6	no	yes	YTHDC2,IGF2BP1,YTHDF1,YTHDF2	yes	0.0023	0.37
DKC1	no	yes	NA	yes	0.0013	0.34
EIF3H	yes	yes	METTL3,YTHDF2	yes	0.00059	0.47
FAM120A	no	yes	IGF2BP1,YTHDF1,YTHDF2,IGF2BP2	yes	0.0006	0.45
FKBP4	no	yes	NA	no	NA	NA
FUBP3	no	yes	IGF2BP1,YTHDF1,YTHDF2,IGF2BP2	no	NA	NA
FUS	no	yes	METTL3,METTL14,YTHDC2	no	NA	NA
FXR1	no	yes	YTHDF1	no	NA	NA
GPKOW	no	yes	YTHDC2	no	NA	NA
GRSF1	no	yes	IGF2BP3,IGF2BP1,IGF2BP2	no	NA	NA
GRWD1	yes	yes	YTHDF2	yes	1.8e-06	0.65
GTF2F1	no	yes	YTHDC2	no	NA	NA
HLTF	no	yes	NA	no	NA	NA
HNRNPA1	no	yes	YTHDC2,YTHDC1,YTHDF2,IGF2BP2,METTL14	yes	0.023	-0.28
HNRNPK	no	yes	IGF2BP1,METTL3,YTHDC1,WTAP,METTL14	yes	0.00043	0.42
HNRNPL	no	yes	IGF2BP3	no	NA	NA
HNRNPM	no	yes	YTHDC2,IGF2BP3,METTL3,METTL14	yes	0.023	0.26
HNRNPU	no	yes	YTHDC2,IGF2BP3,IGF2BP1,METTL3,WTAP,METTL14	no	NA	NA
HNRNPUL1	no	yes	NA	yes	0.00015	0.41
IGF2BP1	yes	yes	IGF2BP3,YTHDF1,IGF2BP2	yes	0.0027	0.42
IGF2BP2	yes	yes	IGF2BP3,IGF2BP1,YTHDF1	yes	0.0059	0.35
IGF2BP3	no	yes	IGF2BP1,IGF2BP2	no	NA	NA
ILF3	no	yes	IGF2BP1,IGF2BP2,METTL14	yes	0.0051	0.3
KHSRP	no	yes	METTL3	yes	1.1e-05	0.51
LARP4	yes	yes	YTHDC2,IGF2BP1,YTHDF1,YTHDF2,IGF2BP2	no	NA	NA
LIN28B	no	yes	YTHDC2	no	NA	NA
LSM11	no	yes	NA	no	NA	NA
METAP2	no	yes	NA	no	NA	NA
MTPAP	no	yes	NA	yes	0.023	0.24
NCBP2	no	yes	YTHDC2	yes	0.034	0.29
NKRF	no	yes	NA	no	NA	NA
PCBP2	yes	yes	IGF2BP1,METTL3,WTAP,IGF2BP2,METTL14	yes	0.00084	0.42
PPIG	no	yes	NA	yes	5.3e-05	0.54
PPIL4	no	yes	NA	no	NA	NA
PRPF8	no	yes	YTHDC2,METTL14	yes	2.4e-05	0.53
PTBP1	yes	yes	IGF2BP1,METTL3,IGF2BP2,METTL14	yes	0.00022	0.4
PUM2	yes	no	YTHDC2,YTHDF1,YTHDF2,IGF2BP2	yes	0.00054	0.46
QKI	no	yes	YTHDC2,IGF2BP1	yes	0.0024	0.36
RBFOX2	no	yes	NA	no	NA	NA
RBM15	yes	yes	METTL3,WTAP,METTL14	yes	1.8e-05	0.68
RBM22	no	yes	YTHDC2	yes	0.0087	0.28
RBM5	no	yes	YTHDC2	yes	0.026	0.24
RPS3	no	yes	METTL14	yes	2e-05	0.52
SAFB2	no	yes	NA	no	NA	NA
SF3A3	no	yes	YTHDC2,METTL14	yes	0.028	0.25
SF3B4	no	yes	YTHDC2,YTHDF1,METTL14	yes	6e-06	0.58
SFPQ	no	yes	METTL3,YTHDF2,METTL14	no	NA	NA
SLTM	no	yes	NA	yes	5.3e-05	0.51
SMNDC1	no	yes	NA	no	NA	NA
SND1	no	yes	YTHDC2	yes	0.00036	0.48
SRSF1	no	yes	YTHDC2,YTHDC1,METTL14	yes	0.015	0.31
SRSF7	no	yes	YTHDC2,METTL14	no	NA	NA
SRSF9	no	yes	YTHDC2,METTL14	no	NA	NA
SUB1	no	yes	WTAP,METTL14	no	NA	NA
SUGP2	no	yes	NA	yes	4.6e-06	-0.48
SUPV3L1	no	yes	NA	yes	0.0025	0.34
TAF15	no	yes	YTHDC2	yes	2.7e-05	0.45
TARDBP	no	yes	YTHDC2,METTL3,YTHDF2,IGF2BP2,METTL14	no	NA	NA
TBRG4	no	yes	NA	no	NA	NA
TIA1	no	yes	YTHDC2	yes	0.015	0.3
TRA2A	no	yes	YTHDC2,YTHDC1	no	NA	NA
U2AF1	no	yes	NA	no	NA	NA
U2AF2	no	yes	METTL3,METTL14	yes	0.0067	0.37
UCHL5	yes	yes	NA	yes	0.003	0.42
UPF1	yes	yes	IGF2BP1,YTHDF1,YTHDF2,IGF2BP2	yes	1.2e-05	0.64
XRCC6	no	yes	METTL3,METTL14	yes	0.011	0.27
YBX3	no	yes	YTHDC2,IGF2BP3,IGF2BP1,YTHDF2	no	NA	NA
YWHAG	no	yes	YTHDF1,YTHDF2	no	NA	NA
ZNF622	yes	yes	NA	yes	0.00011	0.5
ZNF800	yes	no	NA	yes	0.000331	0.414
