# Supplementary material for: Allele-specific RNAN6-methyladenosine modifications reveal functional genetic variants in human tissues
Source: HighWire-hosted journal article supplement (doi:10.1101/gr.277704.123), 2023-08-01
Supplement: Supplemental_Table_S3.xlsx [file Supplemental_Table_S3.xlsx]

## Sheet: Sheet1
Supplemental Table S3.
Primers used in this study.
Name	Sequence
ALMS1-f	CAGAGTCCACGGGGAATGGG
ALMS1-r	CTGAGGGTCCAGCAGATCTG
MGAT5-f	GGGAAGGAAATACAGGATTGAGGG
MGAT5-r	CTCTCCAAGTCCATGAACAGCG
DCTD-f	GCTAGAACGAGAGTGCCTCC
DCTD-r	GGATCGCAGCAGATGACAGA
BCL9L-f	CTGCATCTCATGAACCTGCAGAAC
BCL9L-r	GTCCTGCCCAGCAAGGACATC
RAB36-f	TGTTAGCTCTGCTAACAGTCAGGAC
RAB36-r	GCTGCCAGGCAGTATGTCCAG
TMUB2-f	CCAGATGAAACTGATCTACCAGGGC
TMUB2-r	TCACACAGTTGTCGGTAATGTTCAG
CTNS-f	CTCAGGTGATCATGAATTGGAGGCG
CTNS-r	CTGGAAAGGGTAGGCAGACAGAAG
TMCO3-f	CAGCTGCAGGAAGCTCTCAG
TMCO3-r	CAAACGTGTGCACCTGAAACAG
SNX29-f	CGAGGACATCTCTGGAGAATCATCTG
SNX29-r	GCGCTGTGTGTGAGTGATCTCAG
AS-RT-primer	ACGTAATACGACTCACTATAGT
firstPCR-3‘-R	TCTTTCCCTACACGACGCTCTTCCGATCTNNNNNNACGTAATACGACTCACTATAGT
P7	CAAGCAGAAGACGGCATACGAG
SVIL-f	CACAGAAACCTCCGGTGTCC
SVIL-r	GTCGAGGAACTCTCGGCTG
WDR11-f	CTGAGGAGTGTGCCGATGTT
WDR11-r	TCAAACAGCTCACAGGACCC
MIS18BP1-f	AAGATTCAGTGCCAGCAGGA
MIS18BP1-r	ACCATTAACAGGCTGCCATT
PYGO1-f	TGAACCCTAGGGGAGATCAA
PYGO1-r	TGCTGCCGTCATTGTTTCAC
ZBTB4-f	CCAAGGGCCGGAATCCAC
ZBTB4-r	TGCGCTTAGGCTTGTAGGAG
ZNF177-f	TGGTAGTGTGGAGGAGGGTT
ZNF177-r	AGCCTGTGCTGAAGGACTTT
TRMT61B-f	GGTCCTGTCTTGCTGTGCCTGC
TRMT61B-r	CACGATCTTGCCGAACGGGACTG
TMEM185B-f	GAACACACGTGACCATGGCTATCAG
TMEM185B-r	CCAGCTACACCTGAAAGTGCGAACC
BMP2-f	GGAAGAACTACCAGAAACGAGTGGG
BMP2-r	GTGGAGAGGATGCCCTTTTCCATC
ZNF217-f	GCAGCTGATGACAGTGCTGATAAAG
ZNF217-r	GCAGACTTGGGCTTGGGTTTACAG
MAN2B2-f	GTGACACCACCTCTCCCTCGAG
MAN2B2-r	CAGTAGGTCCACAGTTACCACTGG
TBC1D14-f	GATTCCTACCCTGGAGATCGGGAAC
TBC1D14-r	CTGTGGGTCATCGTCATTCTCCAGG
LMTK2-f	GAGGCAGGTCAAGCCGATGCTAG
LMTK2-r	CTGGGGCTTAATGCAGAACGGAG
CREB3L2-f	CTCGACAGAAGAGTGAACACCACT
CREB3L2-r	GGAGACGAGACGATCCAGCGAG
ABL1-f	CAAGGACACGGAGTGGAGGTCAGTC
ABL1-r	CGAAGAGACACTCGGGTTGATATGAG
ST6GAL1-f	CATCATCATGATGACGCTGTGTGAC
ST6GAL1-r	GCTAGATATGTGTGCATGTGTGTGG
KANK1-f	CAGGTGCACCAGTTCACCAACAC
KANK1-r	GTGCTGATGAGCTGAGAGTTGAGG
DNAJC11-f	CTCTGCTGTGCTGGCTTCCCATG
DNAJC11-r	CGAGAGACAGGCCTCACGTAACT
AKAP2-f	CTGACTTAGCCCCTGAAGAGGCTG
AKAP2-r	GATTCCTGGGTGTCCAGAGTCTGA
TMCO3-f	TGACATGCAAGCTCAGTGGG
TMCO3-r	ACGTGTGCACCTGAAACAGT
ELK4-f	GAACATGGATCCAATGACAGTGGGC
ELK4-r	GTGGTGAAGGTGTTCTGGGAGGTTC
WDR26-f	GGCATCAGATACACACCAGCGAAT
WDR26-r	GGTGTCCAACAACGTTCTAACGACG
PCDH9-f	TGCATCCTCCAGTCCATGCACG
PCDH9-r	CTCATTCTCCTCAGCATATGAGGCG
STAU1-f	GTGGGAGGTGCTGAACCTTTTCTG
STAU1-r	GACCAAACACGGAGGTGCCCA
TMEM44-AS1-f	GCTACATCATAGCTCATCACGGAGC
TMEM44-AS1-r	CAGTGTCAGTGATCTCACAAGCAC
PRRC2B-f	CATCTACTGCAGCAGTCAGCGCAG
PRRC2B-r	GAATCTGCCACGTGTTCATCTTGG
ARHGAP8-f	TCCCTGCCGTGATCCTGAAGAC
ARHGAP8-r	GGAGGTAGGGTAGGCTTGGTGAG
TET2-f	GTCTGGTCAACAAGCTGCGCAAC
TET2-r	CTGTGACTGGCCCTGACATTTC
PDGFC-f	GACCGGTGTCAGGGGATTGCAC
PDGFC-r	GTGAAGATAAGGCCACTCTTCTTTTCAGG
HMGXB4-f	CAGCCCACAGTCTACTGATACAGCT
HMGXB4-r	GGAGATGAATGTGCGTCTGAGGATG
COL25A1-f	GACTCATACCTACACCACCCATTG
COL25A1-r	GGATGGACATCCCTTTTCCCTCAG
ZNF623-f	CGACGTCAGACAGACTCACGGTG
ZNF623-r	CTGATGCTCCATAAGGTGTGAGCTC
TMF1-f	CTAATACGTCTACGCAGTCTCTCAC
TMF1-r	GCTTCTGGCTGACTTTCAGCAGG
DLC1-f	GGAGAGCCTGAAGCTCAAGAGCTC
DLC1-r	TGGAGCTGGAAGAATTGCGTCTC
GTF3C4-f	CCCGACTGGATTAAGAGGTTACTGC
GTF3C4-r	CTCTGTTGGTACATCAGATGCCACG
GAPDH-f1	GATGGGGAAGGTGAAGGTCGGAGTC
GAPDH-r1	GTGGTGAAGACGCCAGTGGACTCC
GAPDH-f2	GTCTTCACCACCATGGAGAAGGCTGG
GAPDH-r2	CTCAGGGATGACCTTGCCCACAG
GAPDH-f3	GATGCAAGGTCATCCCTGAGCTGAACGG
GAPDH-r3	TTACTCCTTGGAGGCCATGTGGGC
POU5F1-f1	GAGTAGTCCCTTCGCAAGCCCTCAT
POU5F1-r1	CTCCTCCGGGTTTTGCTCCAGCTT
POU5F1-f2	GCTCCTGAAGCAGAAGAGGATCACC
POU5F1-r2	GATGTGGCTGATCTGCTGCAGTGTG
POU5F1-f3	AGCGATCAAGCAGCGACTATGCAC
POU5F1-r3	GTGTGTCTATCTACTGTGTCCCAGGC
